# Supplementary material for: Effect of horizontal resolution in North Atlantic mixing and ocean circulation in the EC-Earth3P HighResMIP simulations
Source: Copernicus journal article supplement (doi:10.5194/egusphere-2024-3625), 2024-12-02
Supplement: Supplementary file [file egusphere-2024-3625-AC2-supplement.pdf]

The authors performed simulations with the use of the climate model EC-Earth3P with 3 different spatial resolution, which are eddy-parametrised (SR), eddy-Permitting (HR) and eddy-rich (VHR). The goal is to examine the resolution impact on the oceanic mixing processes, their drivers and AMOC. They firstly compared the simulated mixed layer depth distribution in the North Atlantic, vertical profiles in density/temperature/salinity in Labrador Sea with observations, showing the best performance of the VHR. They then show the resolution effect on the links of North Atlantic westerlies and surface salinity with the Labrador Sea mixed layer depth, as well as the link between Labrador Sea mixed layer depth and AMOC. The authors did a good job. Their work highlight the importance of using high resolution models to accurately capture realistic ocean properties and processes associated with AMOC. The manuscript is well-written, and the conclusions are generally supported by the presented analysis. I would recommend minor revisions for this stage.

We thank the Referee for the time dedicated to read the manuscript and for the constructive comments. The suggested changes have improved the clarity of the article. Answers to each comment can be found below.

### **Specific comments:**

The authors focus on the Labrador Sea mixing and its connect with AMOC, as this region has been considered a key region affecting AMOC. Though it is true that all experiments show a deeper MLD in the Labrador Sea than other deep water formation regions, it doesn't mean the Labrador Sea processes are more important than the Irminger and the Nordic Sea in modulating the AMOC. For example, Ma et al (2024) shows that the Irminger basin could be the most effective region leading to AMOC changes though MLD is the deepest in the Labrador Sea. I would suggest to perform a lagged correlation between AMOC indices and mean surface density in all the three deep water formation sites, to first check which area is the key. An example is Fig. 5 in Shi and Lohmann (2016)

Ma, Qiyun, et al. "Revisiting climate impacts of an AMOC slowdown: dependence on freshwater locations in the North Atlantic." *Science Advances* 10.47 (2024)

Shi, X., & Lohmann, G. (2016). Simulated response of the mid-Holocene Atlantic meridional overturning circulation in ECHAM6-FESOM/MPIOM. *Journal of Geophysical Research: Oceans*, 121(8), 6444-6469.

Thank you. This is a good point. We have replicated the analysis in Figure 7 for the three deep water formation regions of the Northern Hemisphere, using the boxes in the figure below, added as Fig A1 (including also information asked by RC1). We took a big box covering all the Nordic seas from 15° W 65° N to 20° E 80° N; the same box we use for the MLD in the manuscript but cut at 60° N to isolate the Labrador Sea; and a box starting at Cape Farewell until 67° N and 25° W for the Irminger Sea.

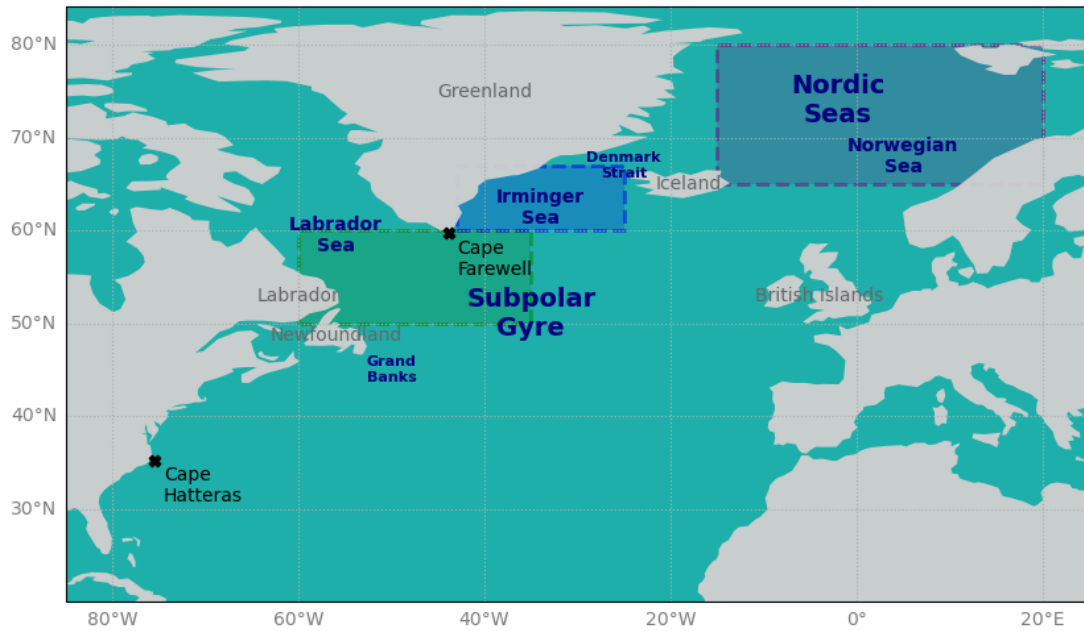

*Supporting Figure 1 : Map including geographical references and boxes used for Labrador Sea (orange), Irminger Sea (blue), and Nordic Seas (purple).*

We compute lead-lagged correlations in the given boxes between MLD and AMOC (to check the driving role of mixing in each of the boxes; Sup. Fig. 2) and the same between surface  $\sigma_0$  and AMOC (as suggested by the reviewer). However, we note that surface density anomalies do not necessarily lead to deep mixing anomalies in that same region, as they can be transported to another region where they are mixed vertically; Sup. Fig. 3). Any of the regions or variables show a correlation of similar shape and strength to the AMOC correlation with itself (Fig 7d-f). This may indicate that the changes on the AMOC can be driven by different sources (mixing in several regions, wind forcing...) as we may expect.

When comparing the correlations of MLD in Labrador and Irminger seas, we find similar patterns for HR and VHR, which also are similar to those in Fig 7b-c. In case of SR, the area where the correlation between the variables is statistically significant is much bigger in the Labrador Sea box, which is also similar to that one in Fig 7a. This justifies the box we took in the manuscript (Fig. 2), which extends further north of the Labrador Sea box defined before. Regarding Nordic seas, there is only SR shows a connected significant propagation pattern that reach low latitudes. However, the pattern starts at negative lags of 3 years, which implies an AMOC leading the mixing there. This may discard this region's mixing change from being driver of the changes in the AMOC.

When checking the correlation with  $\sigma_0$ , we only find a more clear pattern of cause-effect in the Irminger Sea for SR. For HR the correlation in Labrador Sea is similar to the one in Fig 7b. For VHR, the correlation in Irminger Sea is similar to that one in Fig 7c. Note that we discuss Labrador sea as a mixing area, where the MLD grows, but we also include the salinity anomalies brought from the eastern SPG as a driver of mixing (Fig 5), which can be related to the correlation of  $\sigma_0$  - AMOC in Irminger Sea. For the Nordic seas we have similar results to those from the correlation of MLD with the AMOC.

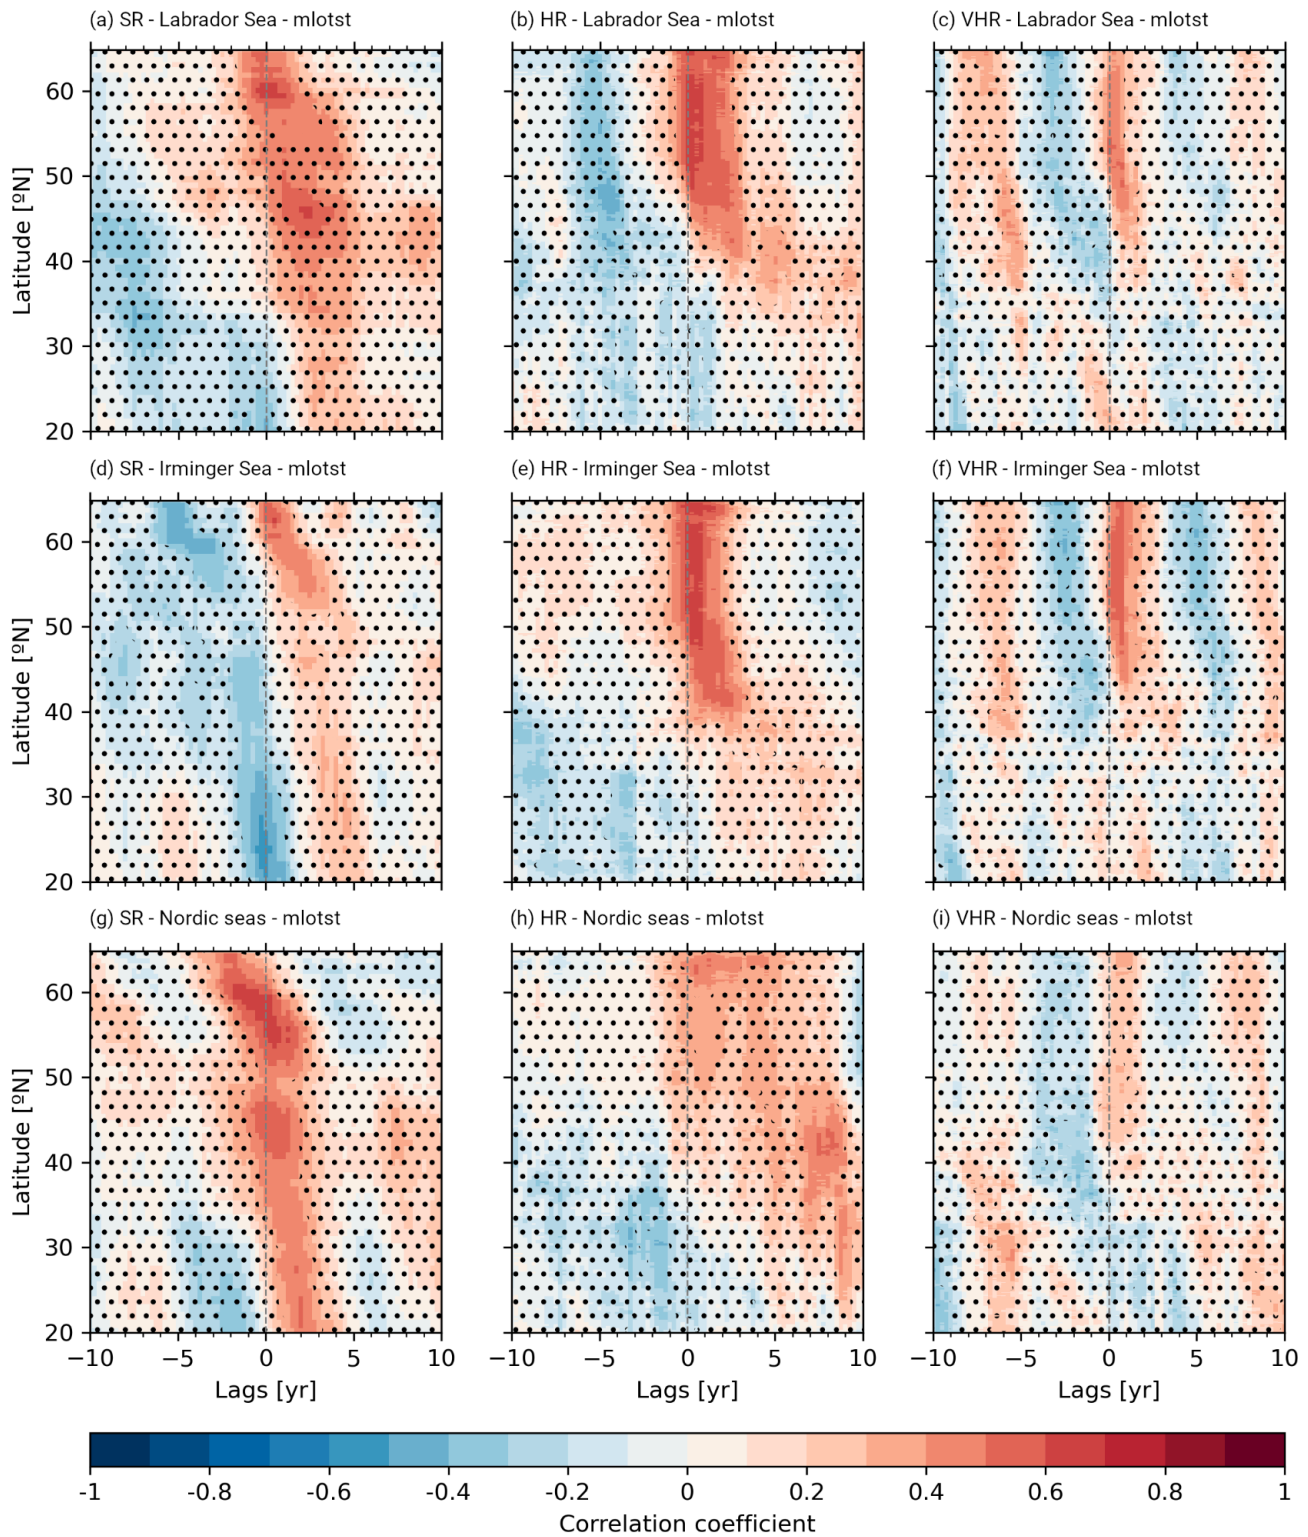

Supporting Figure 2: Correlation of monthly volume overturning stream function without the Ekman transport at  $36.73 \text{ kg m}^{-3}$  sigma2 density level with March MLD at Labrador Sea (a, b, c), Irminger Sea (d, e, f), and Nordic Seas (g, h, i). For positive lag values, March MLD leads. Non-significant values are masked with dots to improve the visibility of the significant regions

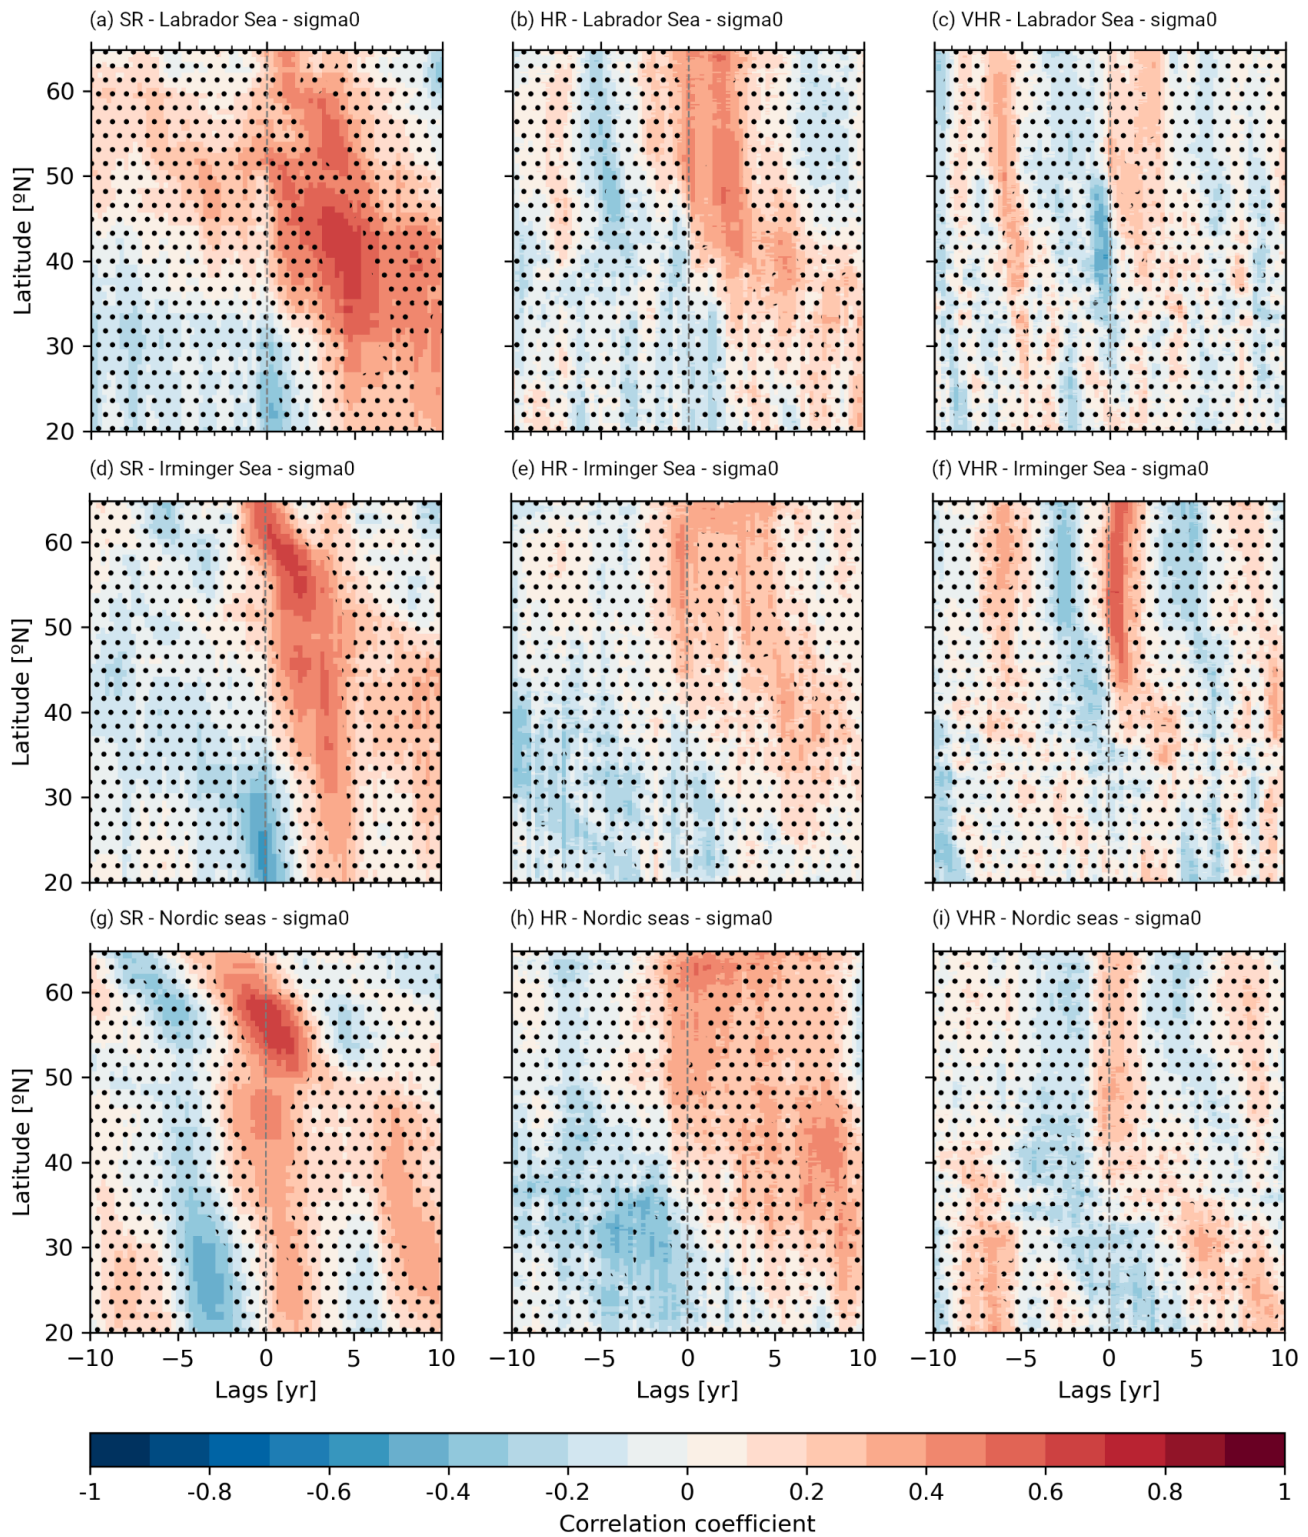

Supporting Figure 3: Correlation of monthly volume overturning stream function without the Ekman transport at  $36.73 \text{ kg m}^{-3}$   $\sigma_{\theta 2}$  density level with March surface  $\sigma_{\theta 0}$  at Labrador Sea (a, b, c), Irminger Sea (d, e, f), and Nordic Seas (g, h, i). For positive lag values, March MLD leads. Non-significant values are masked with dots to improve the visibility of the significant regions

## Minor comments

How the simulated AMOC compared to modern estimation? Is the VHR also better in simulating AMOC strength/streamfunction than other two resolutions?

We think the comparison is not so simple, as the estimations from observations are quite recent, and we are using 1950-control. Moreover, observations are only available from few arrays, which do not give a proper streamfunction structure across all latitudes. Checking Frajka-Williams et al 2019, we see that the three model configurations simulate weaker AMOC than the estimated one, both at 16° N and 26.5° N. However, the models simulate the maximum AMOC at different latitudes as described in other works (e.g. Danabasoglu et al., 2016). On first comparison VHR is not performing better the mean state, when comparing values at 16° N and 26.5° N, but as we have no estimations to where its maximum is (about 32° N in VHR, see Sup. Fig. 4) we cannot say that the AMOC at all latitudes.

MOVE 16° N

Similar values for the 3 model configurations, being all of them lower than the average of the observations.

Frajka-Williams et al., 2019

Over the period February 2000–June 2018, the mean and standard deviation of the daily values are  $18.0 \pm 5.8$  Sv

Experiments (average  $\pm$  Standard deviation of the annual values)

SR:  $14.1 \pm 0.9$  Sv

HR:  $14.9 \pm 0.9$  Sv

VHR:  $14.8 \pm 0.9$  Sv

RAPID 26.5° N

Frajka-Williams et al., 2019

Over the April 2004–February 2017 observational record, the mean and standard deviation of the overturning transport is  $17.0 \pm 4.4$  Sv

Experiments (average  $\pm$  Standard deviation of the annual values)

SR:  $15.8 \pm 1.1$  Sv

HR:  $15.4 \pm 0.9$  Sv

VHR:  $15.0 \pm 0.9$  Sv

32° N

Experiments (average  $\pm$  Standard deviation of the annual values)

SR:  $14.5 \pm 1.1$  Sv

HR:  $15.6 \pm 1.0$  Sv

VHR:  $17.4 \pm 1.2$  Sv

Comparing with reanalysis is also tricky as the resolved AMOC is constrained to the resolution of the used model and its biases, e.g. Jackson et al. 2019. Therefore, we think that this comparison does not give us clear information about which model configuration/resolution is reproducing better the AMOC.

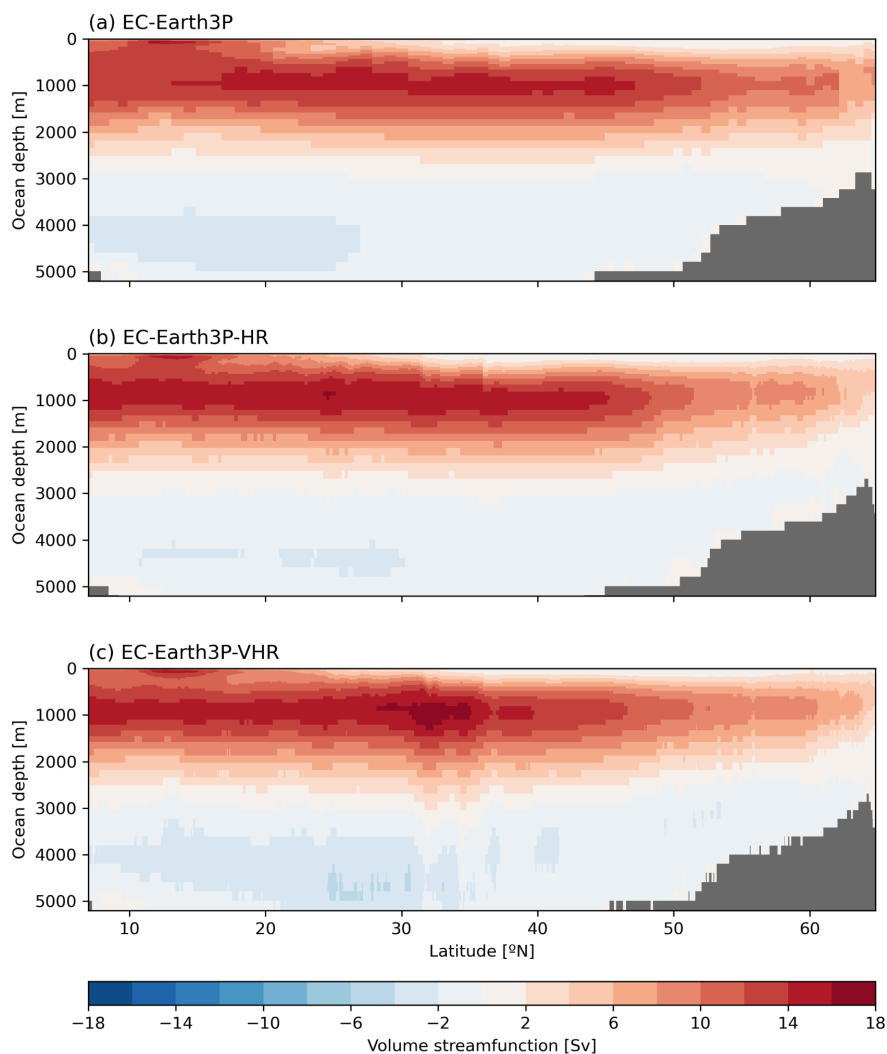

Supporting Figure 4: Climatological volume overturning streamfunction in z-space, for SR (a), HR (b), and VHR (c).

Gokhan Danabasoglu, North Atlantic simulations in Coordinated Ocean-ice Reference Experiments phase II (CORE-II). Part II: Inter-annual to decadal variability, *Ocean Modelling*, Volume 97, 2016, <https://doi.org/10.1016/j.ocemod.2015.11.007>

Jackson, L. C., Dubois, C., Forget, G., Haines, K., Harrison, M., Iovino, D., et al. (2019). The mean state and variability of the North Atlantic circulation: A perspective from ocean reanalyses. *Journal of Geophysical Research: Oceans*, 124, 9141–9170. <https://doi.org/10.1029/2019JC015210>

In Section 3.1 The authors show that the VHR behaves the best in simulating the vertical profile of Labrador Sea properties, is this improvement mostly related to more accurate eddy effects or more realistic presentation of ocean properties and processes, e.g., topography, currents...

It is difficult to attribute the improvements to any of the specific changes in the model configuration or related processes, as they come all together. It must be remarked that VHR configuration is not high enough to resolve all eddies in the Labrador Sea, where the model resolution would need to be finer than  $1/12^\circ$  (see the map in [Hallberg 2013](#)). However, VHR resolution allows resolving mesoscale eddies south of the Labrador Sea, where they are key for the transport of heat and salinity.

We have added the following to the manuscript:

“The better representation of the vertical profile in VHR may be due to different factors. Although VHR does not have the resolution capable of resolving eddies explicitly in the Labrador Sea (a resolution of  $1/16^\circ$  would be necessary; Hallberg 2013), it has a fine enough resolution to do it south of the Labrador Sea, where mesoscale eddies are key for the transport of heat and salinity to the Labrador Sea. In addition, better topography and resolution of boundary currents and the improved air-sea interaction, between many other processes, may also influence the correction of these biases.”

Robert Hallberg, Using a resolution function to regulate parameterizations of oceanic mesoscale eddy effects, *Ocean Modelling*, Volume 72, 2013, <https://doi.org/10.1016/j.ocemod.2013.08.007>

Regarding the different propagation speed in surface water in VHR versus other setups, and the differences in how the mixing propagates and impacts the AMOC, what kind of role is played by the meso scale eddies and high-resolution topography here?

As before, it is not easy to attribute the origin in the observed changes. The improvements in the resolution and topography allow having narrower (or more confined) deep western boundary currents and also solving the boundary waves, such as the Kelvin waves, which may explain the faster propagation of the signal (Getzlaff et al. 2005).

Getzlaff, J., C. W. Böning, C. Eden, and A. Biastoch (2005), Signal propagation related to the North Atlantic overturning, *Geophys. Res. Lett.*, 32, L09602, doi:10.1029/2004GL021002.

Caption of Figure 7, please indicate who leads whom when lag >0.

Done, added the sentence “For positive lag values, March Labrador Sea MLD (a, b, c) or AMOC at  $55^\circ$  N (d, e, f) leads.”

Caption of Figure 8, if I understand it correctly, the figure is for correlation between MLD and density. Is the “stream function” a typo here?

Corrected, it was a typo.
